# Supplementary material for: The Need for Collaborative Investments in Effective Administrator Preparation Programs.
Source: Springer Nature journal article supplement (doi:10.1186/s12967-019-2123-9), 1975-04-01
Supplement: MOESM1 [file 17374614]

## SUPPLEMENTAL MATERIAL

**Table S1.** Dutch Lipid Clinic Network Clinical Criteria for familial hypercholesterolemia

| Criteria                                                                                                                  | Points |
|---------------------------------------------------------------------------------------------------------------------------|--------|
| <b><i>Family history</i></b>                                                                                              |        |
| First-degree relative with known premature (men: <55 years; women: <60 years) coronary artery disease or vascular disease | 1      |
| First-degree relative with known LDL-C level above the 95th percentile                                                    | 1      |
| First-degree relative with tendinous xanthomata and/or arcus cornealis                                                    | 2      |
| Children aged less than 18 years with LDL-C level above the 95th percentile                                               | 2      |
| <b><i>Clinical history</i></b>                                                                                            |        |
| Patient with premature (men: <55 years; women: <60 years) coronary artery disease                                         | 2      |
| Patient with premature (men: <55 years; women: <60 years) cerebrovascular or peripheral vascular disease                  | 1      |
| <b><i>Physical examination</i></b>                                                                                        |        |
| Tendinous xanthomata                                                                                                      | 6      |
| Arcus cornealis (<45 years)                                                                                               | 4      |
| <b><i>LDL-C levels</i></b>                                                                                                |        |
| LDL-C $\geq$ 8.5 mmol/l                                                                                                   | 8      |
| LDL-C 6.5–8.4 mmol/l                                                                                                      | 5      |
| LDL-C 5.0–6.4 mmol/l                                                                                                      | 3      |
| LDL-C 4.0–4.9 mmol/l                                                                                                      | 1      |
| <b><i>DNA analysis</i></b>                                                                                                |        |
| Causative mutation in the <i>LDLR</i> , <i>ApoB</i> or <i>PCSK9</i> gene                                                  | 8      |

**Total score of diagnosis FH:**

Definite FH >8

Probable FH 6–8

Possible FH 3–5

Unlikely FH 0–2

**Table S2.** International Classification of Diseases Codes for MACE.

| <b>Diagnosis/Procedure</b>         | <b>ICD-9-CM codes/ ICD-10 codes</b>    |
|------------------------------------|----------------------------------------|
| myocardial infarction              | I21                                    |
| angina pectoris                    | I20                                    |
| cardiovascular death               | death due to I00-I10, I11,I13, I20-I51 |
| ischemic stroke                    | I63, I64                               |
| percutaneous coronary intervention | ICD-9-CM 36.06/36.07                   |
| coronary artery bypass grafting    | ICD-9-CM 36.1-36.19                    |

**Table S3.** Correlation of PCSK9 level with clinical characteristics at baseline.

| <b>variables</b>      | <b>Spearman rho</b> | <b>p value</b> |
|-----------------------|---------------------|----------------|
| Age                   | 0.009               | 0.873          |
| Male                  | 0.153               | 0.005          |
| BMI                   | -0.056              | 0.340          |
| Family history of CHD | 0.014               | 0.794          |
| Currently smoking     | 0.038               | 0.517          |
| Alcohol drinker       | 0.132               | 0.122          |
| Hypertension          | 0.031               | 0.587          |
| Diabetes              | 0.057               | 0.311          |
| Baseline statin use   | 0.036               | 0.504          |
| XM                    | 0.21                | 0.001          |
| TG                    | -0.061              | 0.263          |
| TC                    | 0.235               | 0.001          |
| HDL-C                 | 0.012               | 0.828          |
| LDL-C                 | 0.227               | 0.001          |
| ApoA                  | -0.026              | 0.642          |
| ApoB                  | 0.221               | 0.001          |
| Lp(a)                 | 0.256               | 0.001          |
| hsCRP                 | 0.002               | 0.977          |
| FPG                   | 0.007               | 0.897          |
| HbA1C                 | 0.018               | 0.761          |
| WBC                   | 0.015               | 0.797          |
| LYM                   | -0.023              | 0.700          |

**Table S4.** Baseline characteristics of FH patients according to CACS.

| <b>Variables</b>                 | <b>CACS 0<br/>(N=28)</b>    | <b>CACS 1-100<br/>(N=71)</b> | <b>CACS &gt;100<br/>(N=63)</b> | <b>p-value<br/>for trend</b> |
|----------------------------------|-----------------------------|------------------------------|--------------------------------|------------------------------|
| <b><i>Clinical factors</i></b>   |                             |                              |                                |                              |
| Age, years                       | 52.31 ± 8.14                | 50.04 ± 10.39                | 51.22 ± 10.29                  | 0.541                        |
| Male, n (%)                      | 17 (60.7)                   | 45 (63.4)                    | 32 (50.8)                      | 0.473                        |
| BMI, kg/(m <sup>2</sup> )        | 25.31 ± 2.58                | 25.64 ± 3.67                 | 25.98 ± 3.30                   | 0.652                        |
| Family history of CAD, n (%)     | 16 (57.1)                   | 36 (50.7)                    | 31 (49.2)                      | 0.551                        |
| Currently smoking, n (%)         | 12 (42.9)                   | 35 (49.3)                    | 28 (44.4)                      | 0.345                        |
| Alcohol drinker, n (%)           | 8 (28.6)                    | 21 (29.6)                    | 16 (25.4)                      | 0.882                        |
| Hypertension, n (%)              | 13 (40.6)                   | 35 (49.3)                    | 36 (61.0)                      | 0.151                        |
| Diabetes, n (%)                  | 4 (14.3)                    | 10 (14.1)                    | 12 (19.5)                      | 0.520                        |
| Baseline statin use, n (%)       | 24 (85.7)                   | 64 (90.1)                    | 49 (77.8)                      | 0.402                        |
| Tendon xanthoma, n (%)           | 2 (7.1)                     | 5 (7.0)                      | 3 (4.8)                        | 0.899                        |
| <b><i>Laboratory factors</i></b> |                             |                              |                                |                              |
| TG, mmol/L                       | 1.71 (1.30 - 2.08)          | 1.58 (1.24 - 1.85)           | 1.71 (1.26 - 2.36)             | 0.058                        |
| TC, mmol/L                       | 6.04 ± 1.52                 | 6.11 ± 1.43                  | 7.12 ± 1.97                    | 0.002                        |
| HDL-C, mmol/L                    | 1.12 ± 0.27                 | 1.08 ± 0.34                  | 1.08 ± 0.29                    | 0.802                        |
| LDL-C, mmol/L                    | 4.41 ± 1.59                 | 4.51 ± 1.25                  | 5.31 ± 1.68                    | 0.003                        |
| ApoA, g/L                        | 1.34 ± 0.27                 | 1.30 ± 0.32                  | 1.31 ± 0.33                    | 0.774                        |
| ApoB, g/L                        | 1.34 ± 0.38                 | 1.31 ± 0.36                  | 1.54 ± 0.49                    | 0.006                        |
| Lp(a), mg/dL                     | 27.76 (13.69-50.97)         | 43.88 (19.40-67.41)          | 37.94 (11.04-82.27)            | 0.303                        |
| hsCRP, mg/L                      | 2.11 (0.99 - 3.56)          | 1.58 (0.79 - 3.68)           | 1.58 (0.75 - 3.54)             | 0.941                        |
| FPG, mmol/L                      | 5.86 ± 2.09                 | 5.30 ± 1.55                  | 5.75 ± 1.42                    | 0.155                        |
| HbA1C, %                         | 6.24 ± 1.35                 | 6.14 ± 1.09                  | 6.28 ± 1.10                    | 0.782                        |
| WBC, ng/mL                       | 6.54 ± 2.01                 | 6.41 ± 1.90                  | 6.69 ± 1.98                    | 0.713                        |
| LYM, ng/mL                       | 1.95 ± 0.65                 | 2.02 ± 0.51                  | 2.11 ± 0.70                    | 0.442                        |
| PCSK9, ng/mL                     | 240.71<br>(216.74 - 309.49) | 291.58<br>(239.09 - 367.61)  | 377.68<br>(318.51 - 447.64)    | < 0.001                      |

**Table S5.** Baseline characteristics of FH patients according to Gensini Score.

| <b>Variables</b>                 | <b>GS T1<br/>(N=94)</b>     | <b>GS T2<br/>(N=95)</b>     | <b>GS T3<br/>(N=95)</b>     | <b>p-value<br/>for trend</b> |
|----------------------------------|-----------------------------|-----------------------------|-----------------------------|------------------------------|
| <b><i>Clinical factors</i></b>   |                             |                             |                             |                              |
| Age, years                       | 49.57 ± 11.04               | 51.98 ± 9.27                | 49.23 ± 10.78               | 0.141                        |
| Male, n (%)                      | 50 (53.2)                   | 57 (60.0)                   | 62 (65.3)                   | 0.238                        |
| BMI, kg/(m <sup>2</sup> )        | 24.86 ± 3.12                | 25.81 ± 3.24                | 25.98 ± 3.62                | 0.066                        |
| Family history of CAD, n (%)     | 38 (40.4)                   | 48 (50.5)                   | 47 (49.5)                   | 0.311                        |
| Currently smoking, n (%)         | 24 (25.5)                   | 49 (51.6)                   | 42 (44.2)                   | 0.022                        |
| Alcohol drinker, n (%)           | 14 (14.9)                   | 33 (34.7)                   | 23 (24.2)                   | 0.034                        |
| Hypertension, n (%)              | 23 (24.5)                   | 51 (53.7)                   | 54 (56.8)                   | 0.001                        |
| Diabetes, n (%)                  | 14 (14.9)                   | 17 (17.9)                   | 25 (26.3)                   | 0.123                        |
| Statin use, n (%)                | 60 (63.8)                   | 91 (95.8)                   | 84 (88.4)                   | 0.001                        |
| Tendon xanthoma, n (%)           | 7 (7.4)                     | 4 (4.2)                     | 11 (11.6)                   | 0.163                        |
| <b><i>Laboratory factors</i></b> |                             |                             |                             |                              |
| TG, mmol/L                       | 1.51 (1.11 - 2.10)          | 1.71 (1.30 - 2.14)          | 1.72 (1.28 - 2.35)          | 0.303                        |
| TC, mmol/L                       | 7.24 ± 2.04                 | 6.15 ± 1.42                 | 7.06 ± 2.22                 | 0.000                        |
| HDL-C, mmol/L                    | 1.19 ± 0.36                 | 1.11 ± 0.30                 | 1.04 ± 0.28                 | 0.005                        |
| LDL-C, mmol/L                    | 5.25 ± 1.78                 | 4.53 ± 1.31                 | 5.22 ± 1.75                 | 0.003                        |
| ApoA, g/L                        | 1.38 ± 0.30                 | 1.33 ± 0.31                 | 1.27 ± 0.31                 | 0.077                        |
| ApoB, g/L                        | 1.47 ± 0.45                 | 1.33 ± 0.33                 | 1.50 ± 0.49                 | 0.015                        |
| Lp(a), mg/dL                     | 25.95 (10.6 - 57.62)        | 35.74 (12.06 - 65.94)       | 40.83 (18.93 - 81.67)       | 0.036                        |
| HsCRP, mg/L                      | 2.23 ± 2.73                 | 2.71 ± 2.79                 | 2.90 ± 3.17                 | 0.261                        |
| FPG, mmol/L                      | 5.18 ± 0.84                 | 5.67 ± 1.64                 | 5.91 ± 1.89                 | 0.362                        |
| HbA1C, %                         | 5.83 ± 0.66                 | 6.19 ± 1.05                 | 6.40 ± 1.30                 | 0.003                        |
| WBC, ng/mL                       | 6.14 ± 1.56                 | 6.40 ± 1.86                 | 6.51 ± 1.98                 | 0.413                        |
| LYM, ng/mL                       | 2.08 ± 0.69                 | 2.03 ± 0.56                 | 2.03 ± 0.77                 | 0.870                        |
| PCSK9, ng/mL                     | 299.02<br>(218.16 - 355.18) | 306.38<br>(241.62 - 387.57) | 331.50<br>(260.41 - 430.49) | 0.025                        |

**Table S6.** Correlations between CACS, Gensini Score and variables.

| Variables             | CACS         |         | Gensini Score |         |
|-----------------------|--------------|---------|---------------|---------|
|                       | Spearman rho | p-value | Spearman rho  | p-value |
| Age                   | 0.050        | 0.527   | 0.006         | 0.919   |
| Male                  | 0.053        | 0.501   | 0.07          | 0.237   |
| BMI                   | 0.061        | 0.443   | 0.104         | 0.089   |
| Family history of CAD | 0.088        | 0.263   | 0.07          | 0.237   |
| Currently smoking     | 0.079        | 0.316   | 0.066         | 0.285   |
| Alcohol drinker       | 0.018        | 0.821   | 0.045         | 0.464   |
| Hypertension          | 0.148        | 0.060   | 0.274         | 0.001   |
| Diabetes              | 0.110        | 0.162   | 0.138         | 0.020   |
| Baseline statin use   | 0.096        | 0.224   | -0.277        | 0.001   |
| Tendon xanthoma       | -0.017       | 0.829   | 0.069         | 0.248   |
| TG                    | 0.079        | 0.319   | 0.099         | 0.095   |
| TC                    | 0.357        | 0.001   | -0.057        | 0.340   |
| HDL-C                 | -0.001       | 0.989   | -0.176        | 0.003   |
| LDL-C                 | 0.346        | 0.001   | -0.037        | 0.531   |
| ApoA                  | -0.046       | 0.563   | -0.12         | 0.044   |
| ApoB                  | 0.265        | 0.001   | 0.001         | 0.987   |
| Lp(a)                 | 0.018        | 0.824   | 0.171         | 0.004   |
| hsCRP                 | -0.010       | 0.899   | 0.161         | 0.007   |
| FPG                   | 0.103        | 0.193   | 0.145         | 0.014   |
| HbA1C                 | 0.119        | 0.135   | 0.178         | 0.004   |
| WBC                   | 0.073        | 0.360   | 0.068         | 0.272   |
| LYM                   | 0.073        | 0.356   | -0.077        | 0.215   |
| PCSK9                 | 0.504        | 0.001   | 0.426         | 0.022   |

**Table S7.** Multiple linear regression analyses of CACS, Gensini score and PCSK9.

| Variables             | CACS       |         |              |         | Gensini score |         |              |         |
|-----------------------|------------|---------|--------------|---------|---------------|---------|--------------|---------|
|                       | Univariate |         | Multivariate |         | Univariate    |         | Multivariate |         |
|                       | $\beta$    | p-value | $\beta$      | p-value | $\beta$       | p-value | $\beta$      | p-value |
| Age                   | -0.015     | 0.985   |              |         | -6.224        | 0.290   |              |         |
| Male                  | 3.710      | 0.819   |              |         | -0.154        | 0.580   |              |         |
| BMI                   | 2.066      | 0.393   |              |         | 1.397         | 0.120   |              |         |
| Family history of CAD | 12.74      | 0.425   |              |         | 8.726         | 0.132   |              |         |
| Currently smoking     | 10.057     | 0.530   |              |         | 1.604         | 0.860   |              |         |
| Hypertension          | 28.763     | 0.070   |              |         | 21.783        | 0.001   | 19.714       | 0.001   |
| Diabetes              | 31.027     | 0.152   | 39.565       | 0.034   | 19.342        | 0.010   |              |         |
| Baseline statin use   | -25.306    | 0.296   |              |         | -22.083       | 0.001   | -17.208      | 0.05    |
| TG                    | 11.450     | 0.077   |              |         | 0.358         | 0.709   |              |         |
| TC                    | 19.595     | 0.000   | 10.161       | 0.018   | 1.749         | 0.230   |              |         |
| HDL-C                 | 1.500      | 0.954   |              |         | -26.954       | 0.001   |              |         |
| LDL-C                 | 21.606     | 0.000   |              |         | 2.140         | 0.220   | 5.623        | 0.003   |
| ApoB                  | 65.916     | 0.000   |              |         | 12.960        | 0.050   |              |         |
| Lp(a)                 | -0.037     | 0.877   |              |         | 0.196         | 0.030   | 0.196        | 0.020   |
| hsCRP                 | 1.893      | 0.472   |              |         | 3.023         | 0.000   |              |         |
| FPG                   | 3.896      | 0.425   |              |         | 5.853         | 0.001   |              |         |
| HbA1C                 | 2.747      | 0.691   |              |         | 8.641         | 0.001   | 7.242        | 0.005   |
| PCSK9                 | 0.483      | 0.000   | 0.449        | < 0.001 | 0.422         | 0.001   | 0.435        | 0.014   |

**Table S8.** Sensitivity analysis of the association of PCSK9 with primary composite endpoints after separate adjustment for each of the other significantly variables.

| <b>Adjustment variable</b> | <b>Multivariable analysis</b>             |                |
|----------------------------|-------------------------------------------|----------------|
|                            | <b>Hazard ratio for PCSK9-SD increase</b> | <b>p-value</b> |
| LDL-C                      | 2.00 (1.46 - 2.73)                        | <0.001         |
| Lp(a)                      | 1.82 (1.35 - 2.46)                        | <0.001         |

**Table S9.** Adjusted hazard ratio and 95% confidence intervals of cardiovascular events according to plasma PCSK9 per-SD increase: Subgroup Analyses

| <b>Characteristics</b> | <b>Case</b> | <b>No. of participants</b> | <b>Adjusted HR (95%CI)</b> | <b>p-value for per SD</b> | <b>p-value for interaction</b> |
|------------------------|-------------|----------------------------|----------------------------|---------------------------|--------------------------------|
| Sex                    |             |                            |                            |                           | 0.802                          |
| Female                 | 13          | 140                        | 2.85 (1.18-6.42)           | 0.014                     |                                |
| Male                   | 20          | 198                        | 2.25 (1.43-3.53)           | 0.001                     |                                |
| Age                    |             |                            |                            |                           | 0.824                          |
| <55                    | 22          | 231                        | 1.93 (1.26-3.06)           | 0.008                     |                                |
| ≥ 55                   | 11          | 107                        | 5.38 (1.63-17.73)          | 0.011                     |                                |
| Baseline Statin use    |             |                            |                            |                           | 0.292                          |
| yes                    | 28          | 262                        | 2.06 (1.31-3.22)           | 0.005                     |                                |
| no                     | 5           | 76                         | 2.25 (1.56-3.24)           | 0.019                     |                                |
| BMI                    |             |                            |                            |                           | 0.156                          |
| < 24                   | 26          | 209                        | 3.72 (1.14-7.34)           | 0.030                     |                                |
| ≥ 24                   | 7           | 129                        | 1.67 (1.12-2.50)           | 0.021                     |                                |
| Diabetes               |             |                            |                            |                           | 0.031                          |
| yes                    | 6           | 64                         | 1.61 (0.58-5.83)           | 0.588                     |                                |
| No                     | 27          | 274                        | 2.35 (1.61-3.43)           | 0.001                     |                                |
| Hypertension           |             |                            |                            |                           | 0.188                          |
| yes                    | 21          | 140                        | 1.71 (1.02-2.92)           | 0.044                     |                                |
| No                     | 12          | 198                        | 3.35 (1.69-6.67)           | 0.001                     |                                |
| Family history of CAD  |             |                            |                            |                           | 0.222                          |
| yes                    | 12          | 157                        | 2.32 (1.04-5.20)           | 0.045                     |                                |
| No                     | 21          | 181                        | 2.78 (1.80-4.29)           | 0.001                     |                                |
| LDL-C                  |             |                            |                            |                           | 0.620                          |
| <4.9                   | 18          | 179                        | 1.81 (1.02-3.37)           | 0.043                     |                                |
| ≥ 4.9                  | 15          | 168                        | 2.13 (1.20-3.78)           | 0.010                     |                                |



**Figure S1.** Comparison of PCSK9 concentrations between patients with or without an event. Values are presented as median  $\pm$  SD.

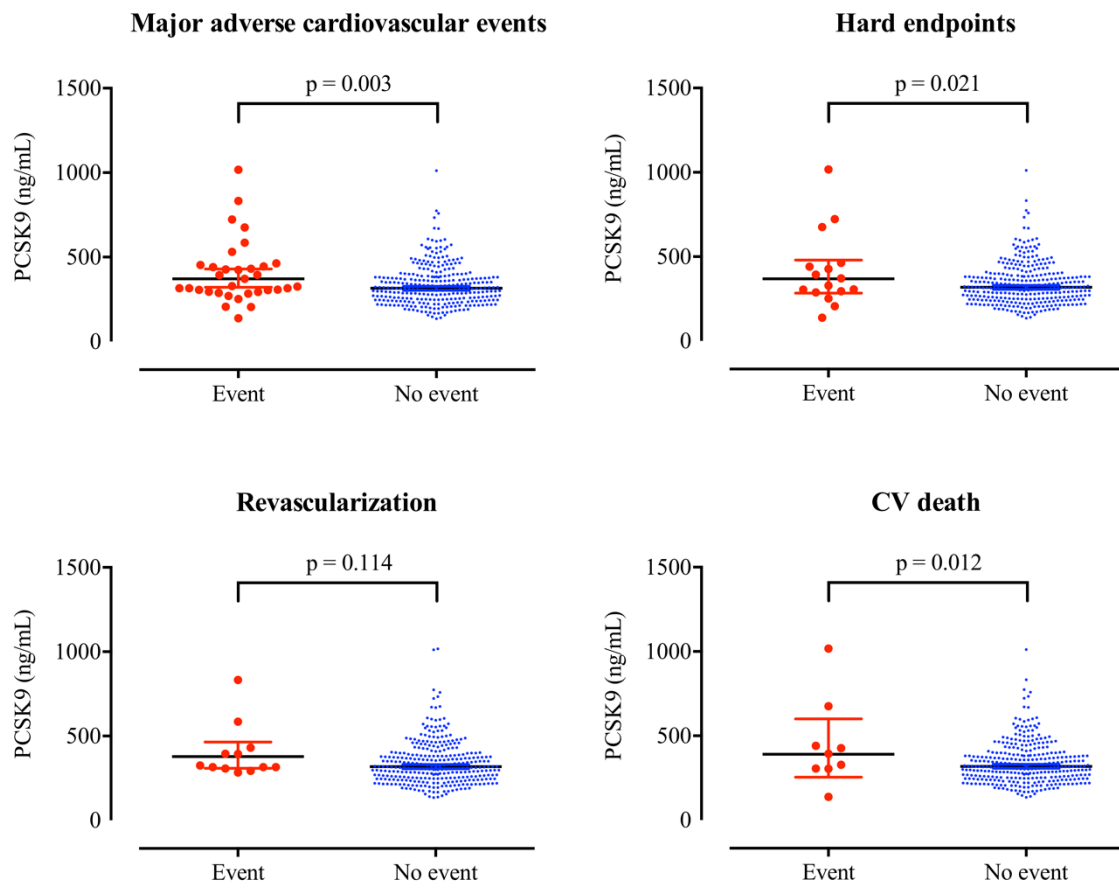

**Figure S2.** Correlation of plasma PCSK9 levels with other bio-markers.

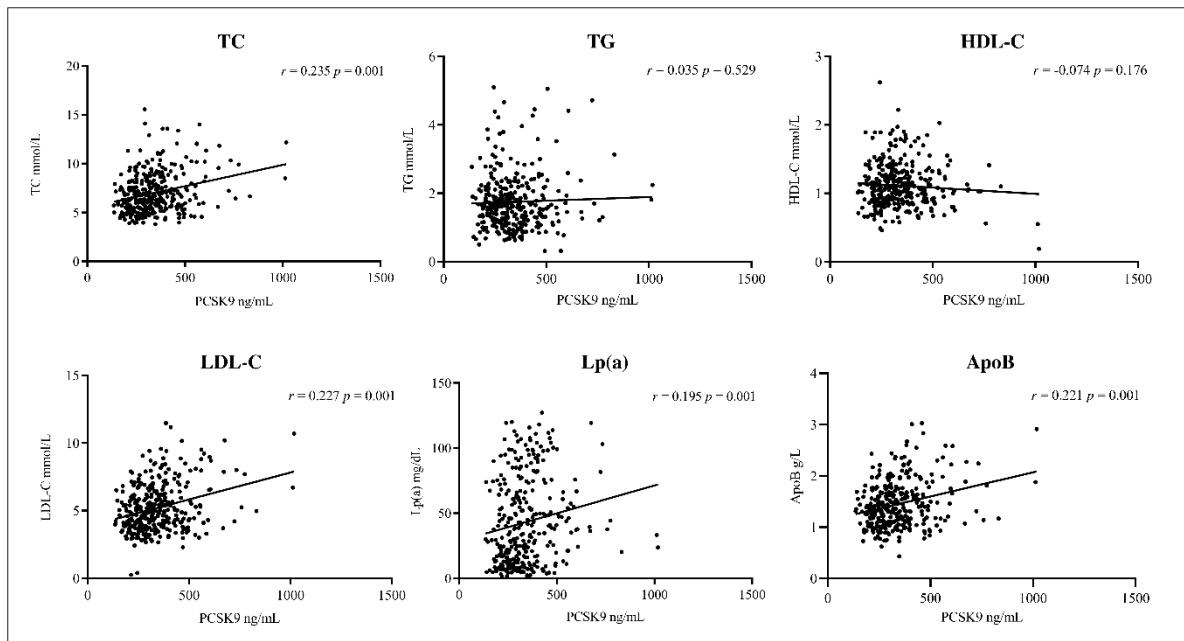

**Figure S3.** Relationship between CACS, Gensini score and PCSK9 concentration.

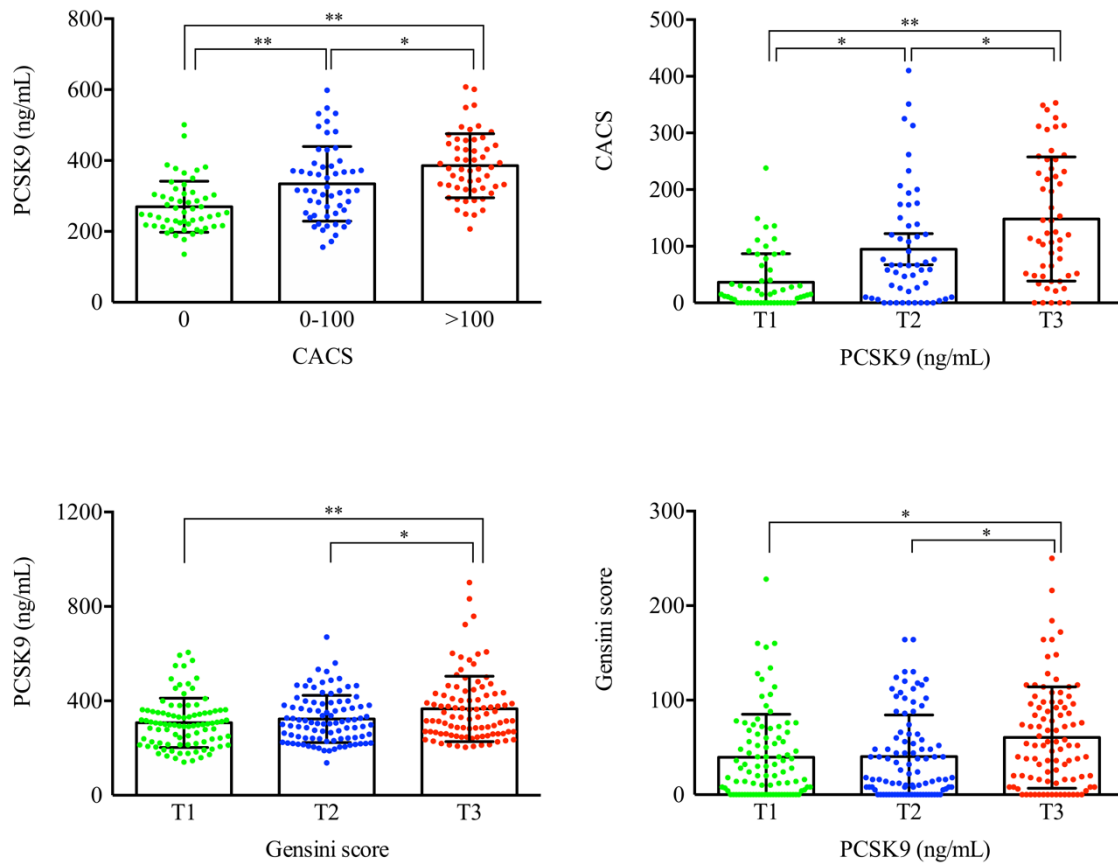

Note: \* p < 0.05; \*\* p < 0.005

**Figure S4.** Receiver operating characteristic curve.

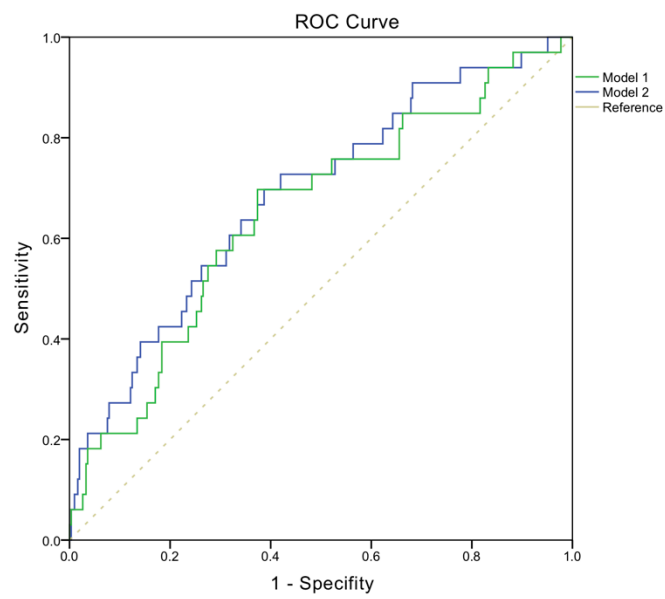

Model 1: including age, male, smoking, diabetes, LDL-C, HDL-C and Lp(a); AUC: 0.652 (95%CI: 0.549-0.754)

Model 2: Model 1+ PCSK9; AUC: 0.682 (95%CI: 0.583 - 0.780)
